# Supplementary material
Source: PubMed Central journal article supplement (PMC2802214)
Supplement: NIHMS162745-supplement-1_si_001.pdf [file NIHMS162745-supplement-1_si_001.pdf]

Supplementary Table 1: *Reliability of Quantifications for Detected Spots, Pinnacle Method*: Summary of coefficient of variation (%CV) for each protein load group for all spots automatically detected (i.e. no hand editing) by Pinnacle.

| Study | Protein Load | Number of Spots | Number of spots with %CV<20 | %CV  |      |      |        |      |      |
|-------|--------------|-----------------|-----------------------------|------|------|------|--------|------|------|
|       |              |                 |                             | Mean | Q05  | Q25  | Median | Q75  | Q95  |
| NC    | 0.5µg        | 937             | 391 (0.42)                  | 22.9 | 9.9  | 16.4 | 21.5   | 28.1 | 38.3 |
|       | 7.5µg        | 937             | 779 (0.83)                  | 14.6 | 5.0  | 9.3  | 12.6   | 17.1 | 28.9 |
|       | 10µg         | 937             | 629 (0.67)                  | 18.9 | 7.5  | 13.3 | 17.2   | 21.7 | 32.3 |
|       | 15µg         | 937             | 811 (0.87)                  | 15.0 | 5.9  | 9.8  | 12.5   | 16.6 | 27.9 |
|       | 30µg         | 937             | 301 (0.32)                  | 24.0 | 13.4 | 18.8 | 22.5   | 26.4 | 36.6 |
|       | 40µg         | 937             | 566 (0.60)                  | 19.3 | 8.7  | 13.7 | 18.0   | 23.1 | 33.8 |
|       | 50µg         | 937             | 745 (0.79)                  | 16.9 | 8.3  | 12.5 | 15.6   | 19.0 | 30.9 |
| SH    | 5µg          | 1322            | 952 (0.72)                  | 16.6 | 3.5  | 8.5  | 13.6   | 20.9 | 37.5 |
|       | 10µg         | 1322            | 52 (0.04)                   | 48.4 | 22.3 | 38.6 | 48.8   | 58.3 | 71.4 |
|       | 25µg         | 1322            | 590 (0.45)                  | 24.6 | 7.2  | 14.8 | 21.7   | 30.0 | 52.0 |
|       | 50µg         | 1322            | 956 (0.72)                  | 16.2 | 3.2  | 7.8  | 12.8   | 21.0 | 41.5 |
|       | 100µg        | 1322            | 191 (0.14)                  | 35.8 | 12.6 | 25.3 | 35.6   | 44.9 | 61.0 |
|       | 150µg        | 1322            | 597 (0.45)                  | 23.2 | 7.0  | 15.7 | 21.0   | 28.2 | 46.3 |
| D1    | Fent         | 719             | 464 (0.65)                  | 19.0 | 5.6  | 11.4 | 16.8   | 23.7 | 39.8 |
|       | Control      | 719             | 230 (0.32)                  | 32.3 | 10.7 | 17.9 | 26.6   | 37.9 | 73.8 |
| D2    | Fent         | 1136            | 673 (0.59)                  | 21.6 | 5.7  | 11.4 | 17.2   | 25.4 | 55.2 |
|       | Control      | 1136            | 398 (0.35)                  | 34.5 | 10.5 | 17.0 | 25.0   | 37.8 | 91.3 |

Supplementary Table 2: *Reliability of Quantifications for Detected Spots, SameSpots*: Summary of coefficient of variation (%CV) for each protein load group for all spots automatically detected (i.e. no hand editing) by SameSpots.

| Study | Protein Load | Number of Spots | Number of spots with %CV<20 | %CV  |      |      |        |      |       |
|-------|--------------|-----------------|-----------------------------|------|------|------|--------|------|-------|
|       |              |                 |                             | Mean | Q05  | Q25  | Median | Q75  | Q95   |
| NC    | 0.5µg        | 688             | 99 (0.14)                   | 37.7 | 14.8 | 23.7 | 32.7   | 43.7 | 74.2  |
|       | 7.5µg        | 688             | 373 (0.54)                  | 24.6 | 8.7  | 13.6 | 18.7   | 28.7 | 54.7  |
|       | 10µg         | 688             | 284 (0.41)                  | 27.0 | 10.3 | 16.3 | 21.8   | 31.8 | 58.0  |
|       | 15µg         | 688             | 421 (0.61)                  | 21.7 | 8.4  | 12.4 | 17.1   | 25.2 | 50.0  |
|       | 30µg         | 688             | 119 (0.17)                  | 29.6 | 15.3 | 21.5 | 26.0   | 32.9 | 51.9  |
|       | 40µg         | 688             | 287 (0.42)                  | 25.1 | 11.5 | 16.9 | 21.6   | 28.2 | 45.8  |
|       | 50µg         | 688             | 214 (0.31)                  | 26.1 | 14.7 | 19.2 | 22.6   | 27.4 | 42.6  |
| SH    | 5µg          | 1037            | 542 (0.52)                  | 22.5 | 4.8  | 11.3 | 19.1   | 29.3 | 50.5  |
|       | 10µg         | 1037            | 71 (0.07)                   | 46.8 | 17.6 | 35.6 | 47.1   | 58.1 | 74.3  |
|       | 25µg         | 1037            | 400 (0.39)                  | 27.3 | 6.2  | 15.3 | 24.2   | 35.0 | 61.0  |
|       | 50µg         | 1037            | 620 (0.60)                  | 20.8 | 3.6  | 9.4  | 16.3   | 27.2 | 53.2  |
|       | 100µg        | 1037            | 230 (0.22)                  | 34.7 | 8.9  | 21.8 | 32.4   | 45.6 | 67.0  |
|       | 150µg        | 1037            | 379 (0.37)                  | 27.1 | 8.0  | 16.9 | 24.7   | 34.1 | 54.7  |
| D1    | Fent         | 1094            | 270 (0.25)                  | 32.5 | 11.8 | 20.1 | 27.1   | 38.7 | 72.6  |
|       | Control      | 1094            | 12 (0.01)                   | 55.1 | 26.9 | 37.9 | 47.8   | 63.5 | 111.7 |
| D2    | Fent         | 1410            | 432 (0.30)                  | 32.8 | 10.7 | 18.4 | 26.3   | 39.5 | 79.8  |
|       | Control      | 1410            | 297 (0.21)                  | 40.0 | 12.6 | 21.5 | 31.3   | 47.7 | 97.0  |

Supplementary Table 3: *Reliability of Quantifications for Detected Spots, SameSpots – PG adjusted*: Summary of coefficient of variation (%CV) for each protein load group for all spots automatically detected (i.e. no hand editing) by SameSpots, with PG for spot detection.

| Study | Protein Load | Number of Spots | Number of spots with %CV<20 | %CV  |      |      |        |      |      |
|-------|--------------|-----------------|-----------------------------|------|------|------|--------|------|------|
|       |              |                 |                             | Mean | Q05  | Q25  | Median | Q75  | Q95  |
| NC    | 0.5µg        | 1033            | 434 (0.42)                  | 24.9 | 9.0  | 16.1 | 21.8   | 28.3 | 42.4 |
|       | 7.5µg        | 1025            | 720 (0.70)                  | 20.1 | 5.8  | 10.4 | 14.8   | 21.9 | 37.9 |
|       | 10µg         | 1032            | 631 (0.61)                  | 23.6 | 7.8  | 13.4 | 18.0   | 23.6 | 67.6 |
|       | 15µg         | 1032            | 693 (0.67)                  | 20.9 | 7.2  | 11.6 | 16.1   | 22.7 | 49.1 |
|       | 30µg         | 1032            | 453 (0.44)                  | 25.7 | 11.4 | 17.1 | 21.1   | 26.5 | 50.7 |
|       | 40µg         | 1032            | 621 (0.60)                  | 22.0 | 9.3  | 14.4 | 18.4   | 23.5 | 43.5 |
|       | 50µg         | 1032            | 648 (0.63)                  | 21.6 | 9.8  | 15.0 | 18.4   | 22.2 | 37.8 |
| SH    | 5µg          | 1305            | 691 (0.53)                  | 21.5 | 4.7  | 11.4 | 19.1   | 29.1 | 45.6 |
|       | 10µg         | 1305            | 84 (0.06)                   | 47.6 | 18.3 | 36.7 | 48.2   | 59.3 | 76.3 |
|       | 25µg         | 1305            | 456 (0.35)                  | 27.7 | 7.1  | 16.3 | 25.0   | 35.7 | 57.4 |
|       | 50µg         | 1305            | 773 (0.59)                  | 20.5 | 3.6  | 10.1 | 17.1   | 27.3 | 49.7 |
|       | 100µg        | 1305            | 233 (0.18)                  | 37.7 | 10.4 | 24.3 | 35.8   | 49.6 | 70.5 |
|       | 150µg        | 1305            | 435 (0.33)                  | 27.4 | 8.4  | 17.7 | 25.3   | 34.1 | 53.9 |
| D1    | Fent         | 1319            | 303 (0.23)                  | 33.2 | 11.8 | 20.8 | 28.1   | 42.1 | 70.6 |
|       | Control      | 1319            | 16 (0.01)                   | 54.2 | 26.9 | 38.5 | 48.1   | 61.7 | 99.3 |
| D2    | Fent         | 1928            | 484 (0.25)                  | 32.8 | 11.1 | 20.0 | 28.6   | 40.9 | 66.1 |
|       | Control      | 1928            | 334 (0.17)                  | 39.8 | 12.8 | 23.2 | 33.8   | 49.9 | 83.8 |

Supplementary Table 4: *Reliability of Quantifications for Detected Spots, SameSpots – hand edited version*: Summary of coefficient of variation (%CV) for each protein load group for all spots detected by SameSpots, after hand editing spots and spot boundaries in SameSpots.

| Study | Protein Load | Number of Spots | Number of spots with %CV<20 | %CV  |      |      |        |      |      |
|-------|--------------|-----------------|-----------------------------|------|------|------|--------|------|------|
|       |              |                 |                             | Mean | Q05  | Q25  | Median | Q75  | Q95  |
| NC    | 0.5µg        | 899             | 408 (0.45)                  | 22.8 | 8.9  | 15.9 | 21.0   | 27.5 | 39.7 |
|       | 7.5µg        | 898             | 673 (0.75)                  | 17.3 | 5.9  | 10.2 | 14.3   | 20.0 | 31.2 |
|       | 10µg         | 899             | 609 (0.68)                  | 19.7 | 7.5  | 12.5 | 16.6   | 21.9 | 36.9 |
|       | 15µg         | 899             | 665 (0.74)                  | 18.1 | 7.2  | 11.6 | 15.3   | 20.3 | 35.1 |
|       | 30µg         | 899             | 416 (0.46)                  | 22.9 | 11.1 | 16.6 | 20.5   | 25.3 | 36.5 |
|       | 40µg         | 899             | 577 (0.64)                  | 19.9 | 8.9  | 14.0 | 17.8   | 22.2 | 34.6 |
|       | 50µg         | 899             | 548 (0.61)                  | 20.3 | 10.1 | 15.2 | 18.7   | 22.4 | 31.2 |
| SH    | 5µg          | 1244            | 675 (0.54)                  | 10.9 | 4.6  | 11.3 | 18.6   | 27.5 | 45.8 |
|       | 10µg         | 1244            | 63 (0.05)                   | 48.7 | 19.8 | 37.1 | 48.6   | 59.6 | 76.7 |
|       | 25µg         | 1244            | 460 (0.37)                  | 26.6 | 6.2  | 15.9 | 23.9   | 34.1 | 56.2 |
|       | 50µg         | 1244            | 815 (0.66)                  | 18.6 | 3.6  | 8.9  | 15.3   | 24.2 | 45.9 |
|       | 100µg        | 1244            | 281 (0.23)                  | 34.4 | 9.5  | 21.5 | 32.7   | 45.3 | 65.7 |
|       | 150µg        | 1244            | 439 (0.35)                  | 27.0 | 8.2  | 17.1 | 24.4   | 33.6 | 54.2 |
| D1    | Fent         | 1153            | 282 (0.24)                  | 30.0 | 11.5 | 20.1 | 26.8   | 36.5 | 57.6 |
|       | Control      | 1153            | 12 (0.01)                   | 51.0 | 27.3 | 37.9 | 46.7   | 58.8 | 91.9 |
| D2    | Fent         | 1390            | 492 (0.35)                  | 27.2 | 10.1 | 17.5 | 24.0   | 33.2 | 54.9 |
|       | Control      | 1390            | 349 (0.25)                  | 32.6 | 12.1 | 20.0 | 28.6   | 40.2 | 67.5 |

Supplementary Table 5: *Reliability of Quantifications for Detected Spots, SameSpots PG –hand edited version:* Summary of coefficient of variation (%CV) for each protein load group for all spots detected by SameSpots, after hand editing spots and spot boundaries using PG interface.

| Study | Protein Load | Number of Spots | Number of spots with %CV<20 | %CV  |      |      |        |      |      |
|-------|--------------|-----------------|-----------------------------|------|------|------|--------|------|------|
|       |              |                 |                             | Mean | Q05  | Q25  | Median | Q75  | Q95  |
| NC    | 0.5µg        | 1081            | 463 (0.43)                  | 23.3 | 8.9  | 15.9 | 21.6   | 28.2 | 40.6 |
|       | 7.5µg        | 1077            | 784 (0.73)                  | 17.9 | 5.9  | 10.4 | 14.9   | 20.7 | 34.7 |
|       | 10µg         | 1081            | 707 (0.65)                  | 20.6 | 7.6  | 12.8 | 17.1   | 22.3 | 40.7 |
|       | 15µg         | 1081            | 759 (0.70)                  | 19.1 | 7.1  | 11.9 | 16.1   | 21.5 | 37.5 |
|       | 30µg         | 1081            | 473 (0.44)                  | 23.9 | 11.2 | 17.0 | 21.1   | 26.1 | 41.3 |
|       | 40µg         | 1081            | 641 (0.59)                  | 20.8 | 8.9  | 14.5 | 18.6   | 23.5 | 36.4 |
|       | 50µg         | 1081            | 639 (0.59)                  | 20.7 | 10.1 | 15.1 | 18.7   | 22.8 | 32.6 |
| SH    | 5µg          | 1383            | 734 (0.53)                  | 21.6 | 4.7  | 11.6 | 19.1   | 28.4 | 47.9 |
|       | 10µg         | 1383            | 77 (0.06)                   | 48.9 | 18.7 | 37.4 | 49.2   | 60.1 | 78.0 |
|       | 25µg         | 1383            | 494 (0.36)                  | 27.2 | 6.6  | 15.9 | 24.6   | 34.7 | 56.4 |
|       | 50µg         | 1383            | 872 (0.63)                  | 19.3 | 3.8  | 9.5  | 16.2   | 25.3 | 46.7 |
|       | 100µg        | 1383            | 279 (0.20)                  | 35.6 | 10.4 | 22.8 | 33.9   | 46.1 | 68.4 |
|       | 150µg        | 1383            | 466 (0.34)                  | 27.6 | 8.5  | 17.2 | 24.7   | 34.0 | 55.7 |
| D1    | Fent         | 1255            | 304 (0.24)                  | 29.9 | 11.8 | 20.1 | 27.0   | 36.7 | 57.5 |
|       | Control      | 1255            | 14 (0.01)                   | 50.7 | 26.7 | 37.7 | 47.0   | 58.0 | 90.0 |
| D2    | Fent         | 1458            | 506 (0.35)                  | 27.5 | 10.1 | 17.5 | 24.4   | 33.5 | 54.9 |
|       | Control      | 1458            | 346 (0.24)                  | 32.6 | 12.4 | 20.6 | 29.3   | 40.2 | 65.8 |

Supplementary Table 6: *Reliability of Quantifications for Detected Spots, Progenesis PG240 Method*: Summary of coefficient of variation (%CV) for each protein load group for all spots automatically detected (i.e. no hand editing) by Progenesis PG240 on aligned gel images.

| Study | Protein Load | Number of Spots* | Number of spots with %CV<20 | %CV  |      |      |        |       |       |
|-------|--------------|------------------|-----------------------------|------|------|------|--------|-------|-------|
|       |              |                  |                             | Mean | Q05  | Q25  | Median | Q75   | Q95   |
| NC    | 0.5µg        | 566              | 69 (0.12)                   | 82.7 | 15.4 | 26.4 | 44.8   | 131.9 | 200.0 |
|       | 7.5µg        | 654              | 296 (0.45)                  | 53.6 | 7.9  | 13.4 | 21.9   | 70.4  | 200.0 |
|       | 10µg         | 706              | 227 (0.32)                  | 53.9 | 10.8 | 18.1 | 25.9   | 70.1  | 200.0 |
|       | 15µg         | 737              | 376 (0.51)                  | 41.4 | 7.8  | 13.2 | 19.6   | 37.1  | 200.0 |
|       | 30µg         | 945              | 147 (0.16)                  | 42.9 | 14.7 | 23.1 | 31.8   | 67.2  | 200.0 |
|       | 40µg         | 970              | 315 (0.32)                  | 39.7 | 10.2 | 17.8 | 25.7   | 44.1  | 118.1 |
|       | 50µg         | 994              | 198 (0.20)                  | 38.1 | 15.3 | 21.3 | 27.3   | 39.9  | 91.4  |
| SH    | 5µg          | 391              | 63 (0.16)                   | 79.7 | 11.5 | 26.9 | 68.9   | 111.7 | 173.2 |
|       | 10µg         | 562              | 8 (0.01)                    | 94.7 | 29.5 | 60.4 | 88.6   | 120.0 | 173.2 |
|       | 25µg         | 688              | 120 (0.17)                  | 67.3 | 10.5 | 25.1 | 46.7   | 94.9  | 173.2 |
|       | 50µg         | 902              | 225 (0.25)                  | 54.8 | 7.6  | 20.0 | 39.9   | 86.8  | 173.2 |
|       | 100µg        | 1089             | 88 (0.08)                   | 72.2 | 15.2 | 38.3 | 61.3   | 97.6  | 173.2 |
|       | 150µg        | 969              | 161 (0.17)                  | 50.4 | 11.3 | 24.1 | 37.5   | 63.7  | 143.5 |

\*The number of spots in this table corresponds to the number of spots that do not have all zeros for Progenesis for the specified protein load.
